# Supplementary material
Source: PubMed Central journal article supplement (PMC3748507)
Supplement: tx400096m_si_001.pdf [file tx400096m_si_001.pdf]

## SUPPORTING INFORMATION

### Removal of alkylation DNA adducts from $N^2$ -alkylguanine and $N^4$ -alkylcytosine by the adaptive response protein AlkB

Deyu Li, Bogdan I. Fedeles, Nidhi Shrivastav, James C. Delaney, Xuedong Yang, Cintyu

Wong, Catherine L. Drennan, and John M. Essigmann\*

#### Corresponding Author

\*E-mail: [jessig@mit.edu](mailto:jessig@mit.edu)

#### Table of Contents

Figure S1. ESI-TOF mass spectrum from incubation of m2G without the AlkB protein. Data represent mass/charge ( $m/z$ ) values for the -4 charge envelope of the 16mer containing m2G.

Figure S2. ESI-TOF mass spectrum from incubation of m2G with the AlkB protein. Data represent mass/charge ( $m/z$ ) values for the -4 charge envelope of the 16mer containing G.

Figure S3. ESI-TOF mass spectrum from incubation of m2G with the AlkB protein. Data represent mass/charge ( $m/z$ ) values for the -4 charge envelope of the 16mer containing m2G.

Figure S4. ESI-TOF mass spectrum from incubation of e2G without the AlkB protein. Data represent mass/charge ( $m/z$ ) values for the -4 charge envelope of the 16mer containing e2G.

Figure S5. ESI-TOF mass spectrum from incubation of e2G with the AlkB protein. Data represent mass/charge ( $m/z$ ) values for the -4 charge envelope of the 16mer containing G.

Figure S6. ESI-TOF mass spectrum from incubation of e2G with the AlkB protein. Data represent mass/charge ( $m/z$ ) values for the -4 charge envelope of the 16mer containing e2G.

Figure S7. ESI-TOF mass spectrum from incubation of FF without the AlkB protein. Data represent mass/charge ( $m/z$ ) values for the -4 charge envelope of the 16mer containing FF.

Figure S8. ESI-TOF mass spectrum from incubation of FF with the AlkB protein. Data represent mass/charge ( $m/z$ ) values for the -4 charge envelope of the 16mer containing G.

Figure S9. ESI-TOF mass spectrum from incubation of FF with the AlkB protein. Data represent mass/charge ( $m/z$ ) values for the -4 charge envelope of the 16mer containing FF-2H.

Figure S10. ESI-TOF mass spectrum from incubation of HF without the AlkB protein. Data represent mass/charge ( $m/z$ ) values for the -4 charge envelope of the 16mer containing HF.

Figure S11. ESI-TOF mass spectrum from incubation of HF with the AlkB protein. Data represent mass/charge ( $m/z$ ) values for the -4 charge envelope of the 16mer containing G.

Figure S12. ESI-TOF mass spectrum from incubation of HF with the AlkB protein. Data represent mass/charge ( $m/z$ ) values for the -4 charge envelope of the 16mer containing FF-2H and FF.

Figure S13. ESI-TOF mass spectrum from incubation of HF with the AlkB protein. Data represent mass/charge ( $m/z$ ) values for the -4 charge envelope of the 16mer containing HO-FF.

Figure S14. ESI-TOF mass spectrum from incubation of m4C without the AlkB protein. Data represent mass/charge ( $m/z$ ) values for the -4 charge envelope of the 16mer containing m4C.

Figure S15. ESI-TOF mass spectrum from incubation of m4C without the AlkB protein. Data represent mass/charge ( $m/z$ ) values for the -4 charge envelope of the 16mer containing U (not C).

Figure S16. ESI-TOF mass spectrum from incubation of m4C with the AlkB protein. Data represent mass/charge ( $m/z$ ) values for the -4 charge envelope of the 16mer containing C.

Figure S17. ESI-TOF mass spectrum from incubation of m4C with the AlkB protein. Data represent mass/charge ( $m/z$ ) values for the -4 charge envelope of the 16mer containing m4C.

Figure S18. MS/MS fragmentation spectrum of 16mer containing m2G (unreacted starting material) in the reaction of m2G with AlkB.

Figure S19. MS/MS fragmentation spectrum of 16mer containing G (repair product) in the reaction of m2G with AlkB.

Figure S20. MS/MS fragmentation spectrum of 16mer containing e2G (unreacted starting material) in the reaction of e2G with AlkB.

Figure S21. MS/MS fragmentation spectrum of 16mer containing G (repair product) in the reaction of e2G with AlkB.

Figure S22. MS/MS fragmentation spectrum of 16mer containing FF (unreacted starting material) in the reaction of FF with AlkB.

Figure S23. MS/MS fragmentation spectrum of 16mer containing G (repair product) in the reaction of FF with AlkB.

Figure S24. MS/MS fragmentation spectrum of 16mer containing HF (unreacted starting material) in the reaction of HF with AlkB.

Figure S25. MS/MS fragmentation spectrum of 16mer containing G (repair product) in the reaction of HF with AlkB.

Figure S26. MS/MS fragmentation spectrum of 16mer containing HO-HF (repair intermediate) in the reaction of HF with AlkB.

Figure S27. MS/MS fragmentation spectrum of 16mer containing m4C (unreacted starting material) in the reaction of m4C with AlkB.

Figure S28. MS/MS fragmentation spectrum of 16mer containing C (repair product) in the reaction of m4C with AlkB.

Figure S29. Predicted collision-induced dissociation (CID) fragmentation pattern of the 16mer oligonucleotide.

Table S1. Percentage of lesion repair by AlkB in 1h in ssDNA and dsDNA.

Table S2. Predicted and observed  $m/z$  for MS/MS fragmentation patterns displayed in Figure S18 of m2G 16mer in the reaction of m2G with AlkB.

Table S3. Predicted and observed  $m/z$  for MS/MS fragmentation patterns displayed in Figure S19 of G 16mer in the reaction of m2G with AlkB.

Table S4. Predicted and observed  $m/z$  for MS/MS fragmentation patterns displayed in Figure S20 of e2G 16mer in the reaction of e2G with AlkB.

Table S5. Predicted and observed  $m/z$  for MS/MS fragmentation patterns displayed in Figure S21 of G 16mer in the reaction of e2G with AlkB.

Table S6. Predicted and observed  $m/z$  for MS/MS fragmentation patterns displayed in Figure S22 of FF 16mer in the reaction of FF with AlkB.

Table S7. Predicted and observed  $m/z$  for MS/MS fragmentation patterns displayed in Figure S23 of G 16mer in the reaction of FF with AlkB.

Table S8. Predicted and observed  $m/z$  for MS/MS fragmentation patterns displayed in Figure S24 of HF 16mer in the reaction of HF with AlkB.

Table S9. Predicted and observed  $m/z$  for MS/MS fragmentation patterns displayed in Figure S25 of G 16mer in the reaction of HF with AlkB.

Table S10. Predicted and observed  $m/z$  for MS/MS fragmentation patterns displayed in Figure S26 of HO-HF 16mer in the reaction of HF with AlkB.

Table S11. Predicted and observed  $m/z$  for MS/MS fragmentation patterns displayed in Figure S27 of m4C 16mer in the reaction of m4C with AlkB.

Table S12. Predicted and observed  $m/z$  for MS/MS fragmentation patterns displayed in Figure S28 of C 16mer in the reaction of m4C with AlkB.

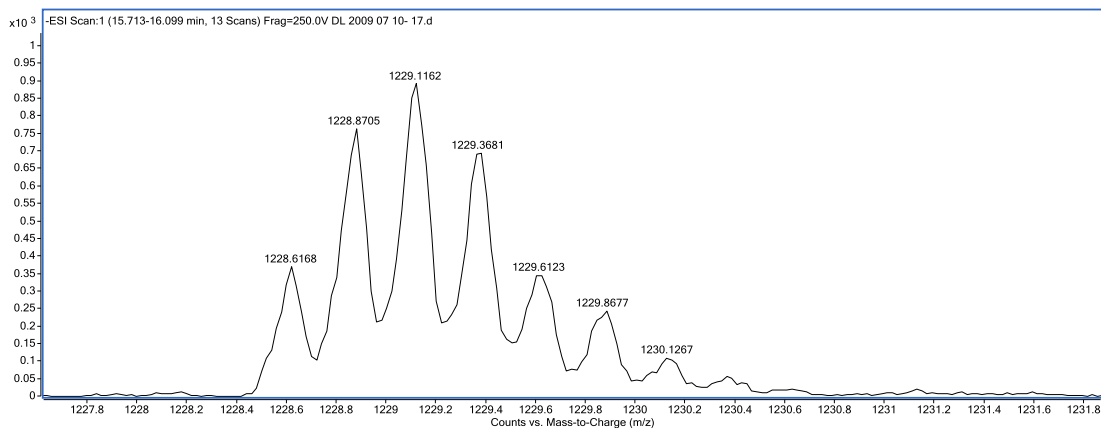

Figure S1. ESI-TOF mass spectrum from incubation of m2G without the AlkB protein. Data represent mass/charge ( $m/z$ ) values for the -4 charge envelope of the 16mer containing m2G (Scheme 1a and Figure 1a).

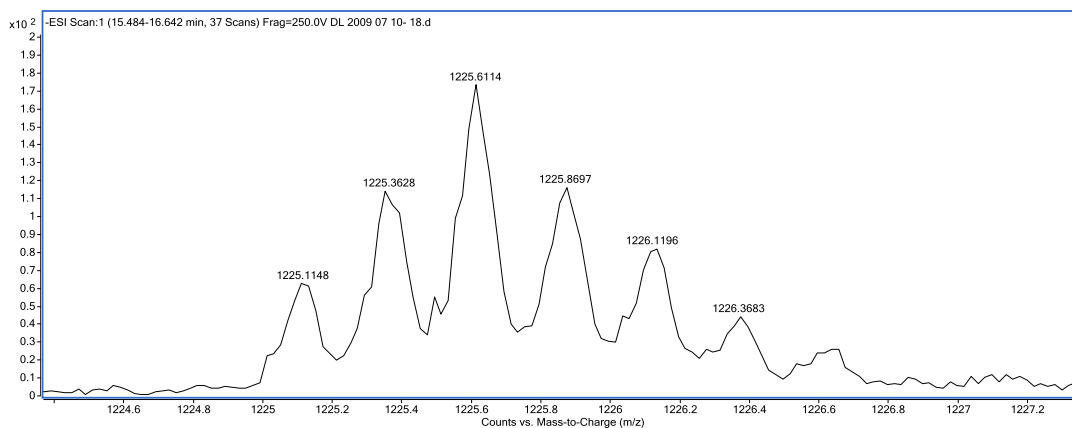

Figure S2. ESI-TOF mass spectrum from incubation of m2G with the AlkB protein. Data represent mass/charge ( $m/z$ ) values for the -4 charge envelope of the 16mer containing G (Scheme 1a and Figure 1b).

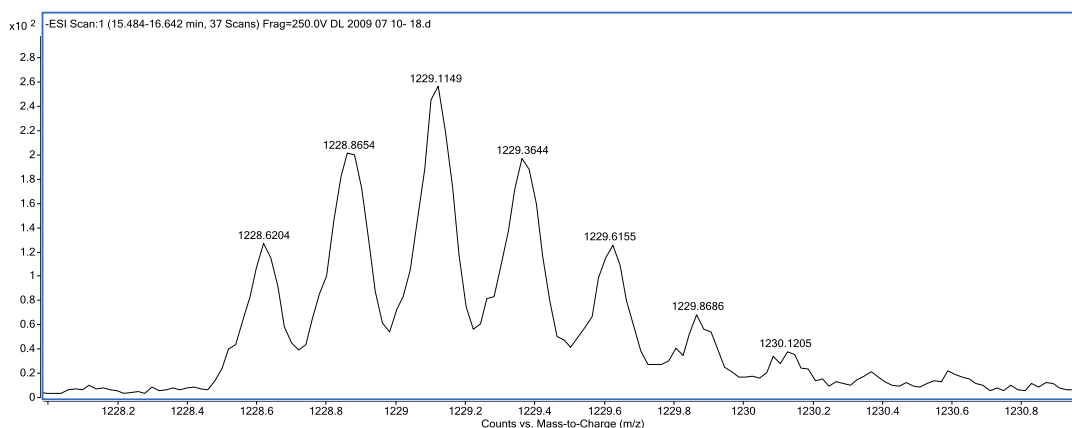

Figure S3. ESI-TOF mass spectrum from incubation of m2G with the AlkB protein. Data represent mass/charge ( $m/z$ ) values for the -4 charge envelope of the 16mer containing m2G (Scheme 1a and Figure 1b).

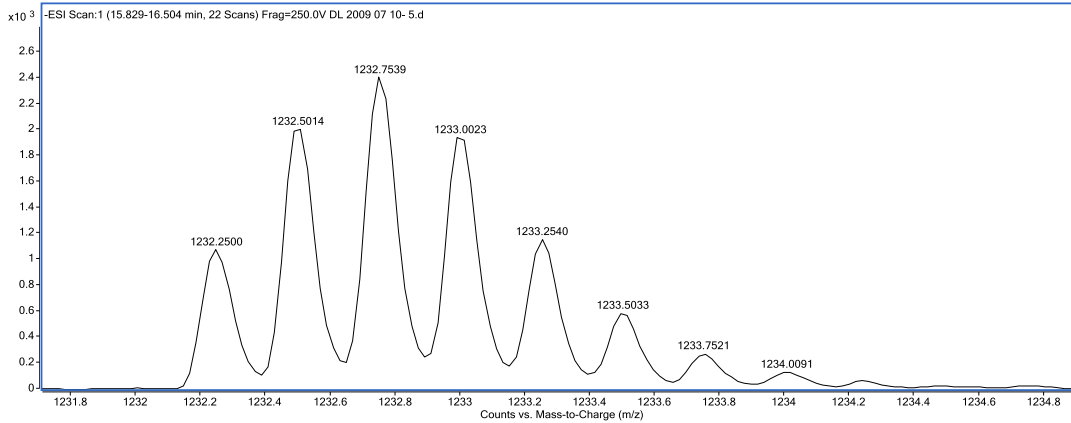

Figure S4. ESI-TOF mass spectrum from incubation of e2G without the AlkB protein. Data represent mass/charge ( $m/z$ ) values for the -4 charge envelope of the 16mer containing e2G (Scheme 1b and Figure 1c).

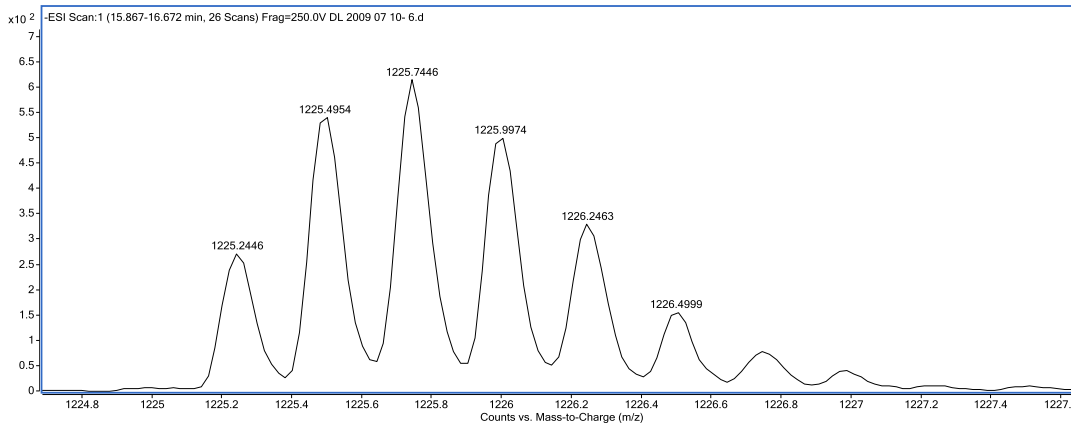

Figure S5. ESI-TOF mass spectrum from incubation of e2G with the AlkB protein. Data represent mass/charge ( $m/z$ ) values for the -4 charge envelope of the 16mer containing G (Scheme 1b and Figure 1d).

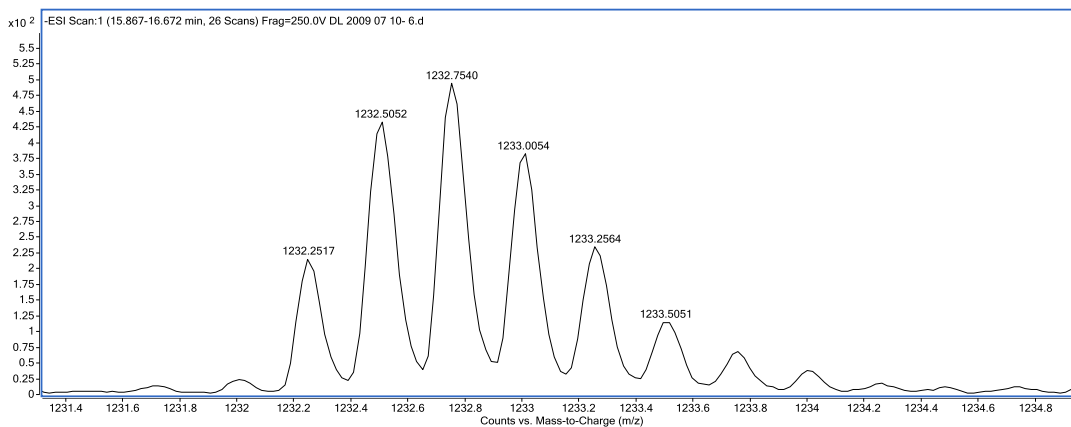

Figure S6. ESI-TOF mass spectrum from incubation of e2G with the AlkB protein. Data represent mass/charge ( $m/z$ ) values for the -4 charge envelope of the 16mer containing e2G (Scheme 1b and Figure 1d).

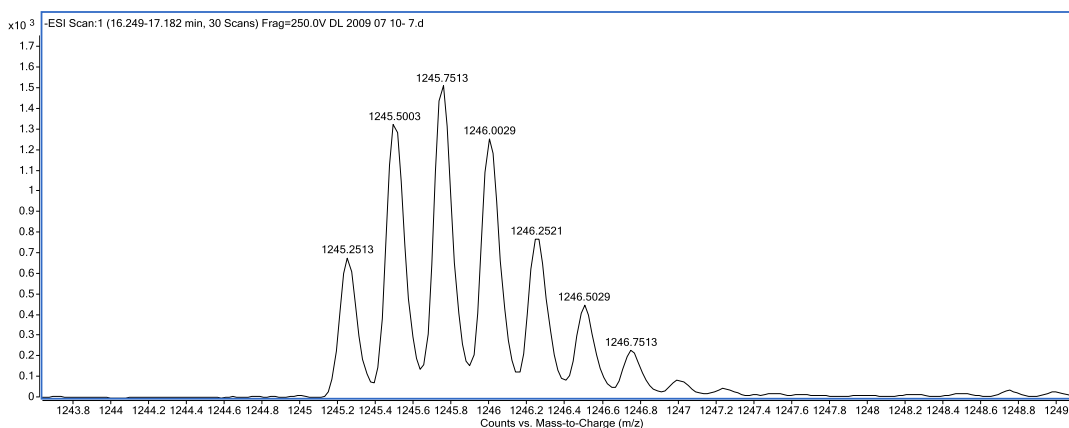

Figure S7. ESI-TOF mass spectrum from incubation of FF without the AlkB protein. Data represent mass/charge ( $m/z$ ) values for the -4 charge envelope of the 16mer containing FF (Scheme 1c and Figure 1e).

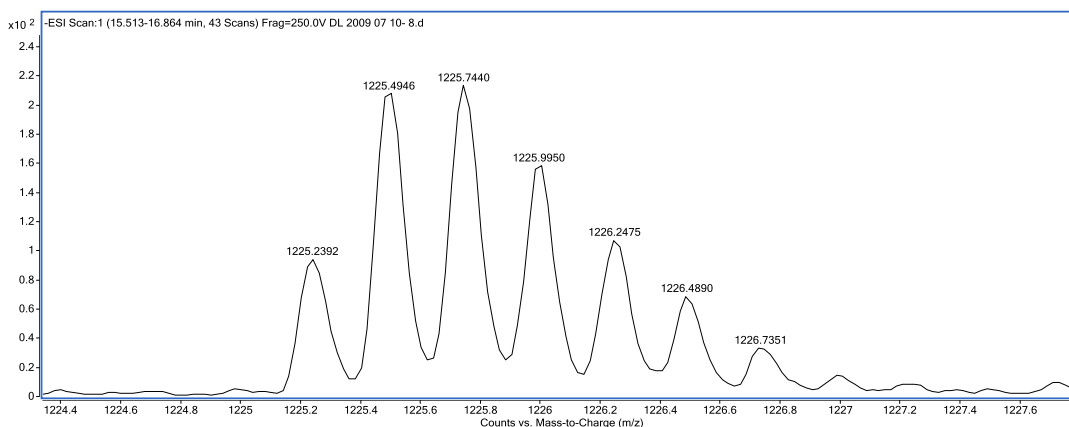

Figure S8. ESI-TOF mass spectrum from incubation of FF with the AlkB protein. Data represent mass/charge ( $m/z$ ) values for the -4 charge envelope of the 16mer containing G (Scheme 1c and Figure 1f).

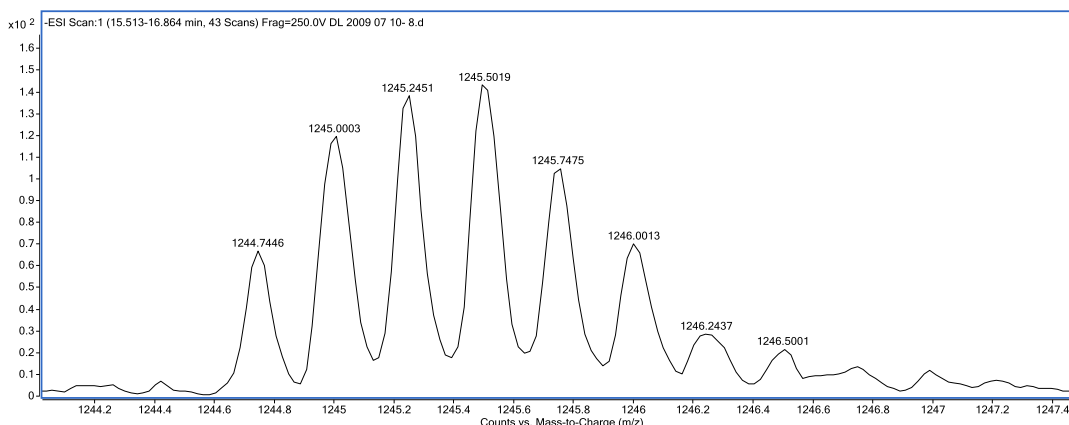

Figure S9. ESI-TOF mass spectrum from incubation of FF with the AlkB protein. Data represent mass/charge ( $m/z$ ) values for the -4 charge envelope of the 16mer containing FF-2H (Scheme 1c and Figure 1f).

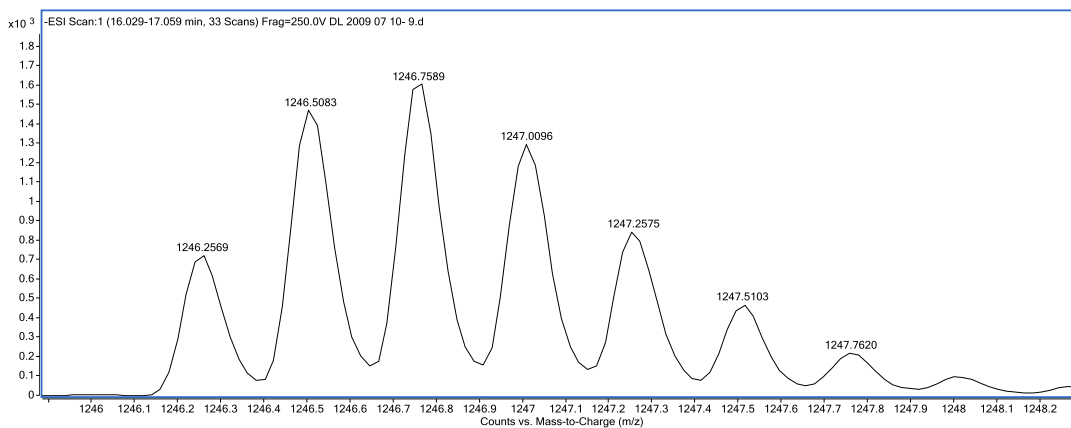

Figure S10. ESI-TOF mass spectrum from incubation of HF without the AlkB protein. Data represent mass/charge ( $m/z$ ) values for the -4 charge envelope of the 16mer containing HF (Scheme 1d and Figure 1g).

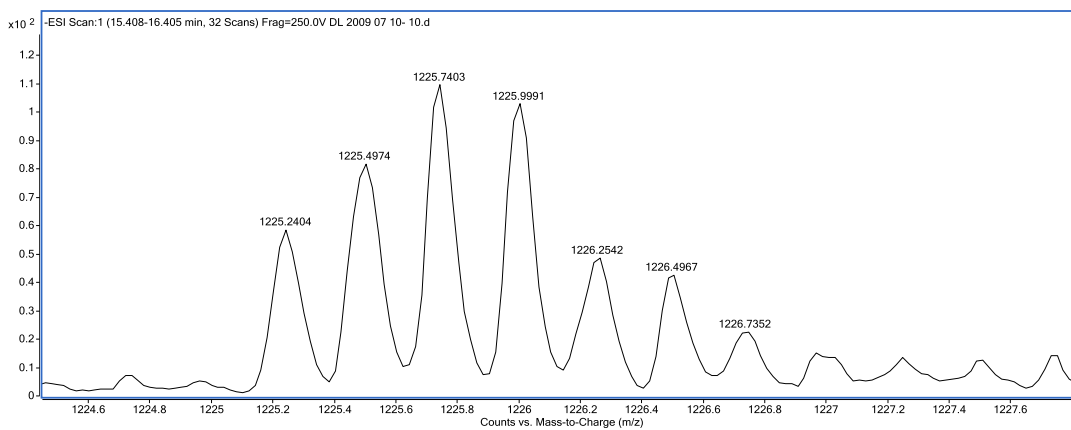

Figure S11. ESI-TOF mass spectrum from incubation of HF with the AlkB protein. Data represent mass/charge ( $m/z$ ) values for the -4 charge envelope of the 16mer containing G (Scheme 1d and Figure 1h).



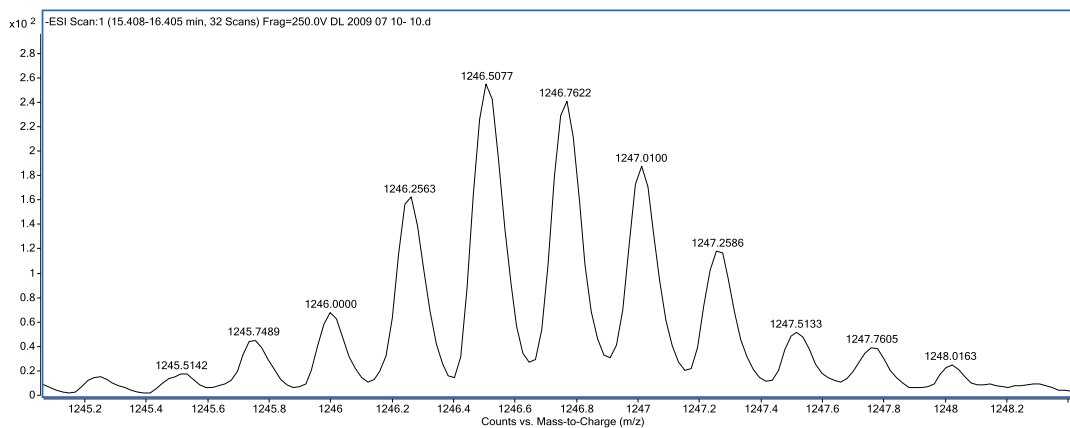

Figure S12. ESI-TOF mass spectrum from incubation of HF with the AlkB protein. Data represent mass/charge ( $m/z$ ) values for the -4 charge envelope of the 16mer containing FF-2H and FF (Scheme 1d and Figure 1h).

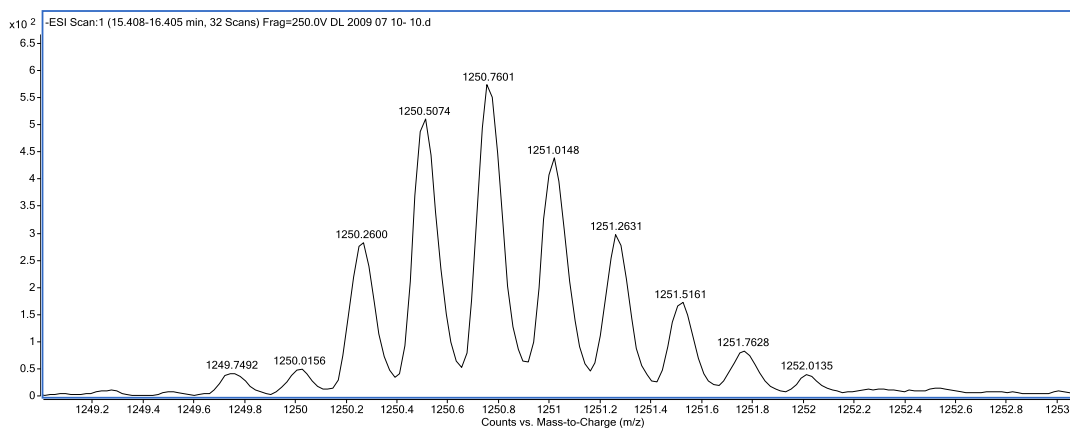

Figure S13. ESI-TOF mass spectrum from incubation of HF with the AlkB protein. Data represent mass/charge ( $m/z$ ) values for the -4 charge envelope of the 16mer containing HO-FF (Scheme 1d and Figure 1h).

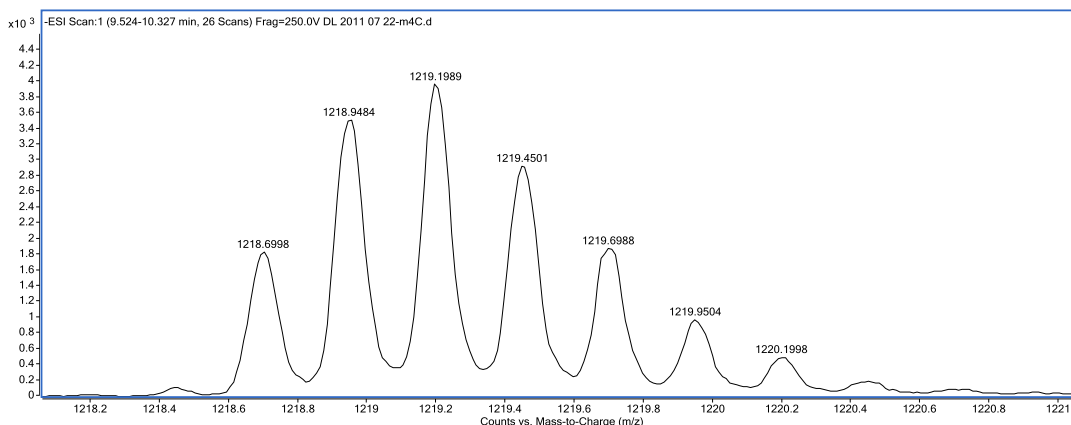

Figure S14. ESI-TOF mass spectrum from incubation of m4C without the AlkB protein. Data represent mass/charge ( $m/z$ ) values for the -4 charge envelope of the 16mer containing m4C (Scheme 1e and Figure 1i).

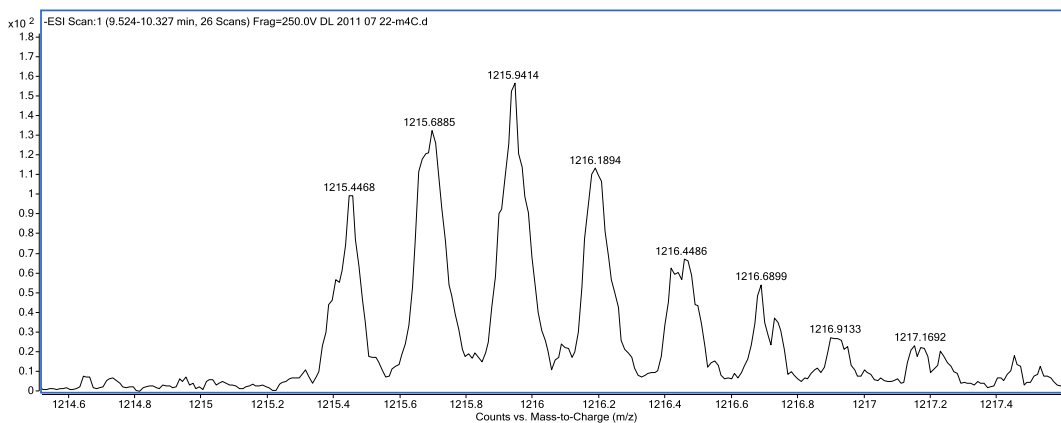

Figure S15. ESI-TOF mass spectrum from incubation of m4C without the AlkB protein. Data represent mass/charge ( $m/z$ ) values for the -4 charge envelope of the 16mer containing U (not C) (Scheme 1e and Figure 1i).

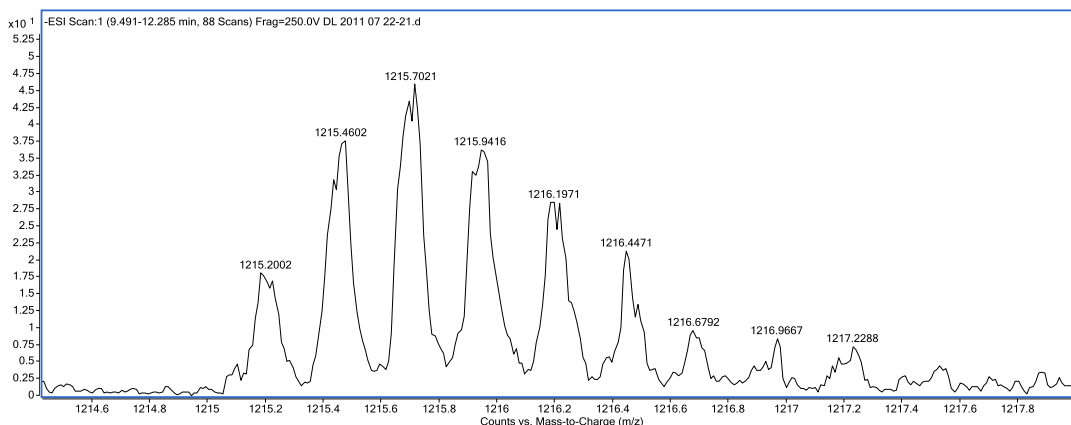

Figure S16. ESI-TOF mass spectrum from incubation of m4C with the AlkB protein. Data represent mass/charge ( $m/z$ ) values for the -4 charge envelope of the 16mer containing C (Scheme 1e and Figure 1j).

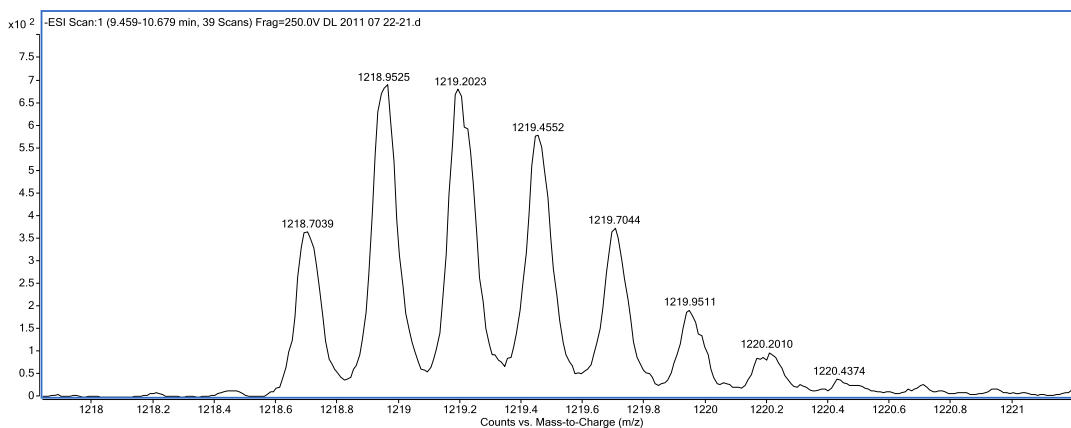

Figure S17. ESI-TOF mass spectrum from incubation of m4C with the AlkB protein. Data represent mass/charge ( $m/z$ ) values for the -4 charge envelope of the 16mer containing m4C (Scheme 1e and Figure 1j).

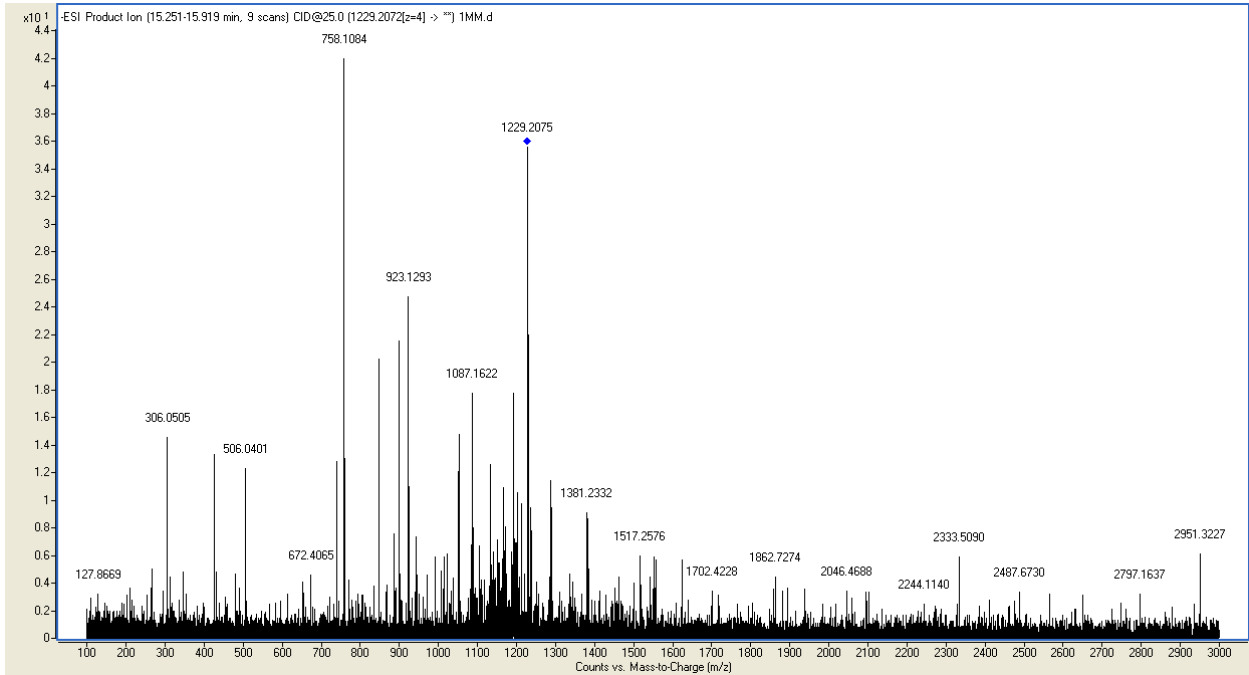

Figure S18. MS/MS fragmentation spectrum of 16mer containing m2G (unreacted starting material) in the reaction of m2G with AlkB. The blue diamond marks the parent ion.

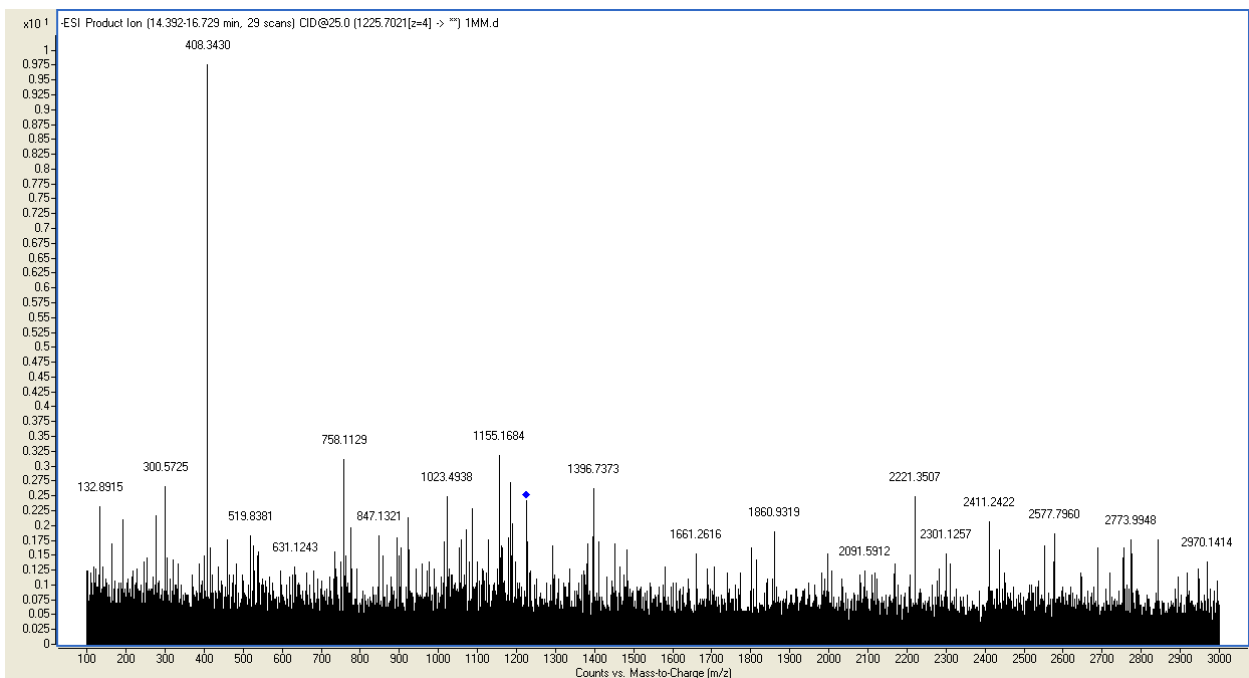

Figure S19. MS/MS fragmentation spectrum of 16mer containing G (repair product) in the reaction of m2G with AlkB. The blue diamond marks the parent ion.

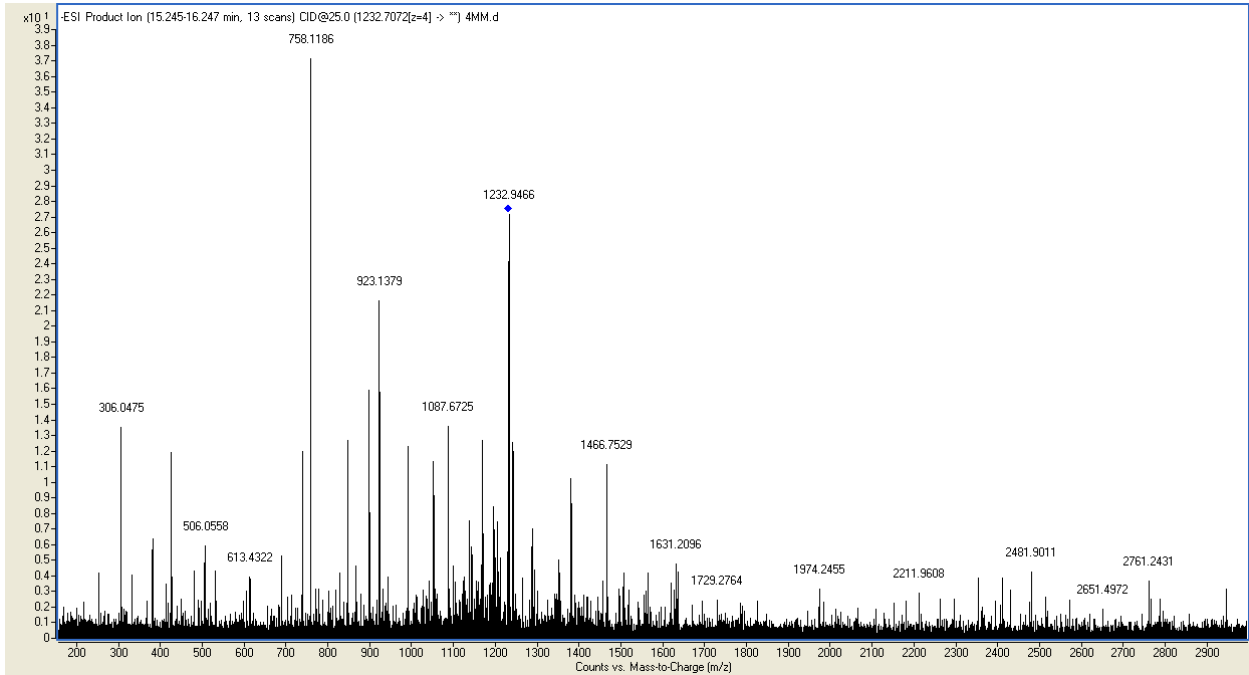

Figure S20. MS/MS fragmentation spectrum of 16mer containing e2G (unreacted starting material) in the reaction of e2G with AlkB. The blue diamond marks the parent ion.

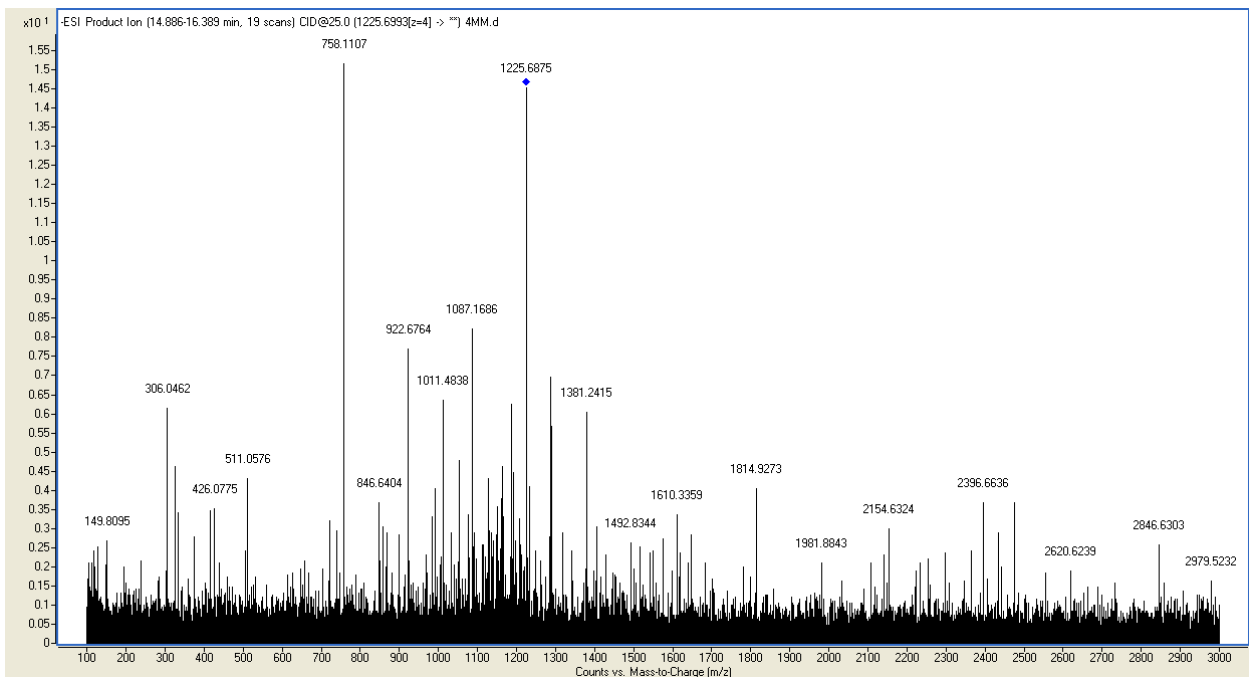

Figure S21. MS/MS fragmentation spectrum of 16mer containing G (repair product) in the reaction of e2G with AlkB. The blue diamond marks the parent ion.

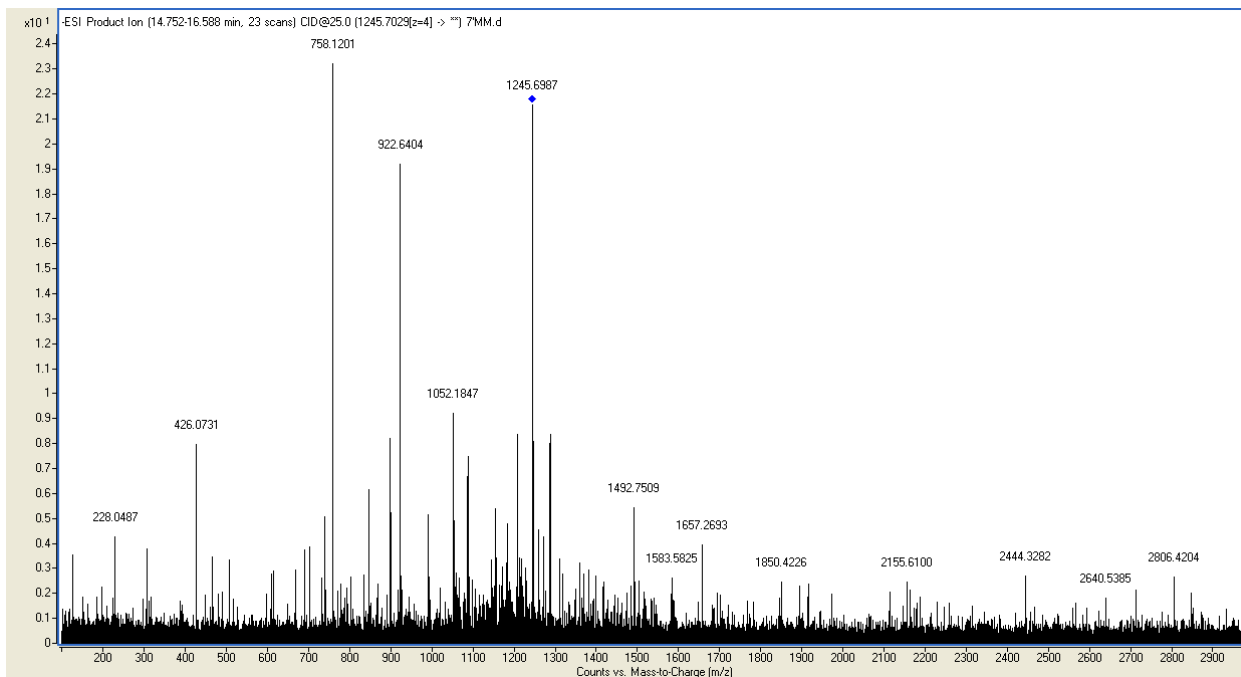

Figure S22. MS/MS fragmentation spectrum of 16mer containing FF (unreacted starting material) in the reaction of FF with AlkB. The blue diamond marks the parent ion.

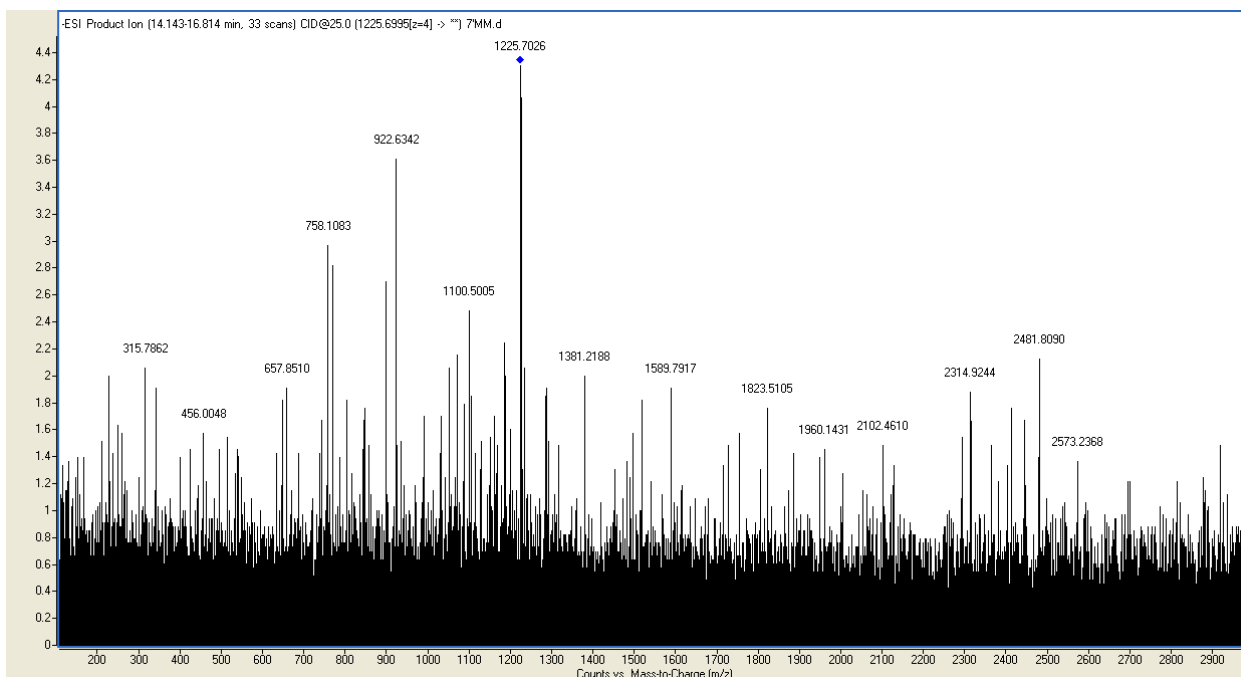

Figure S23. MS/MS fragmentation spectrum of 16mer containing G (repair product) in the reaction of FF with AlkB. The blue diamond marks the parent ion.

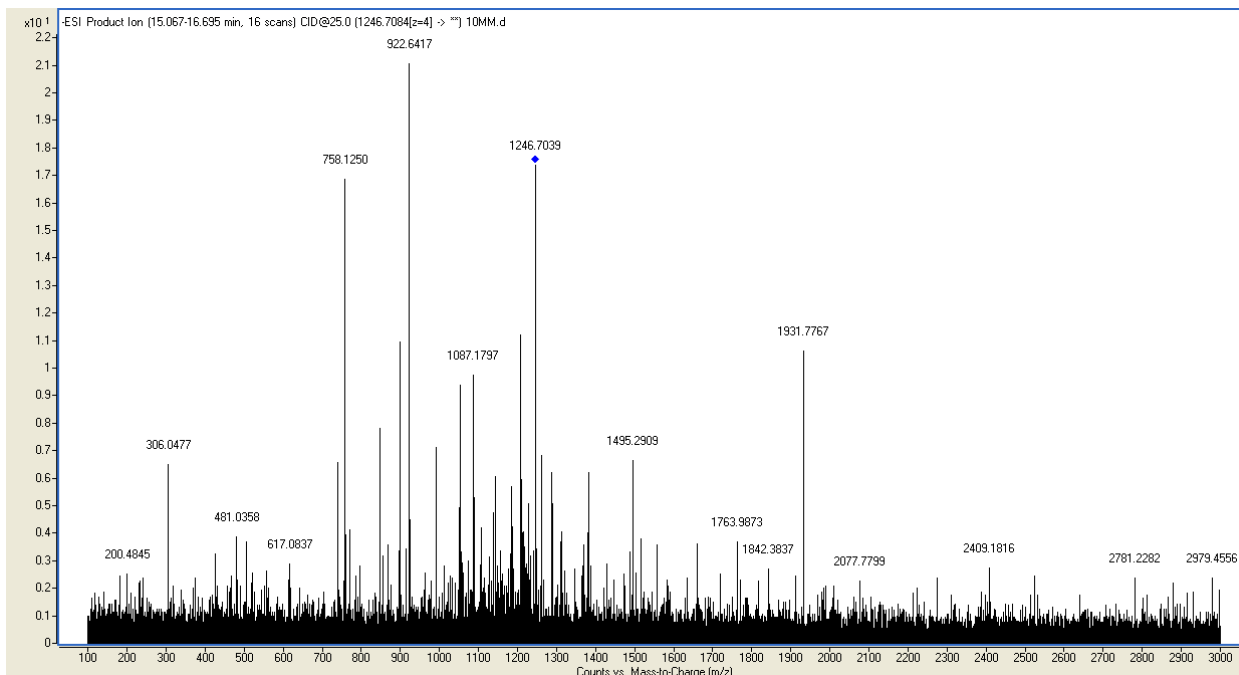

Figure S24. MS/MS fragmentation spectrum of 16mer containing HF (unreacted starting material) in the reaction of HF with AlkB. The blue diamond marks the parent ion.

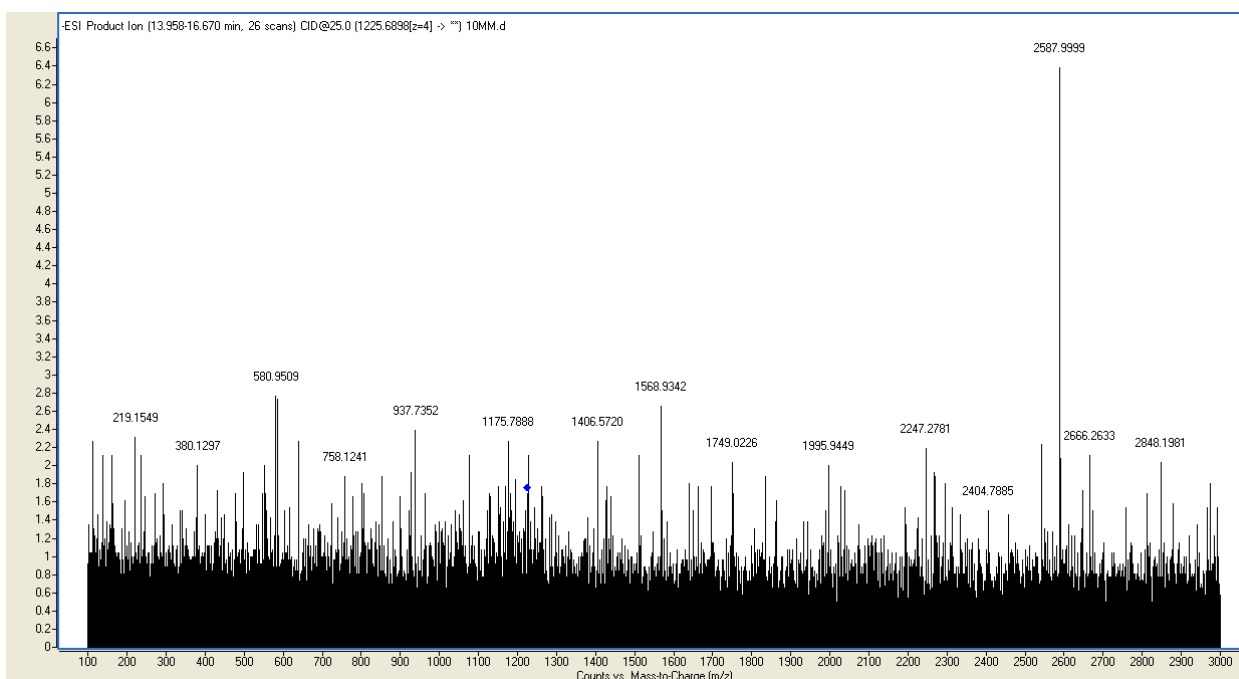

Figure S25. MS/MS fragmentation spectrum of 16mer containing G (repair product) in the reaction of HF with AlkB. The blue diamond marks the parent ion.

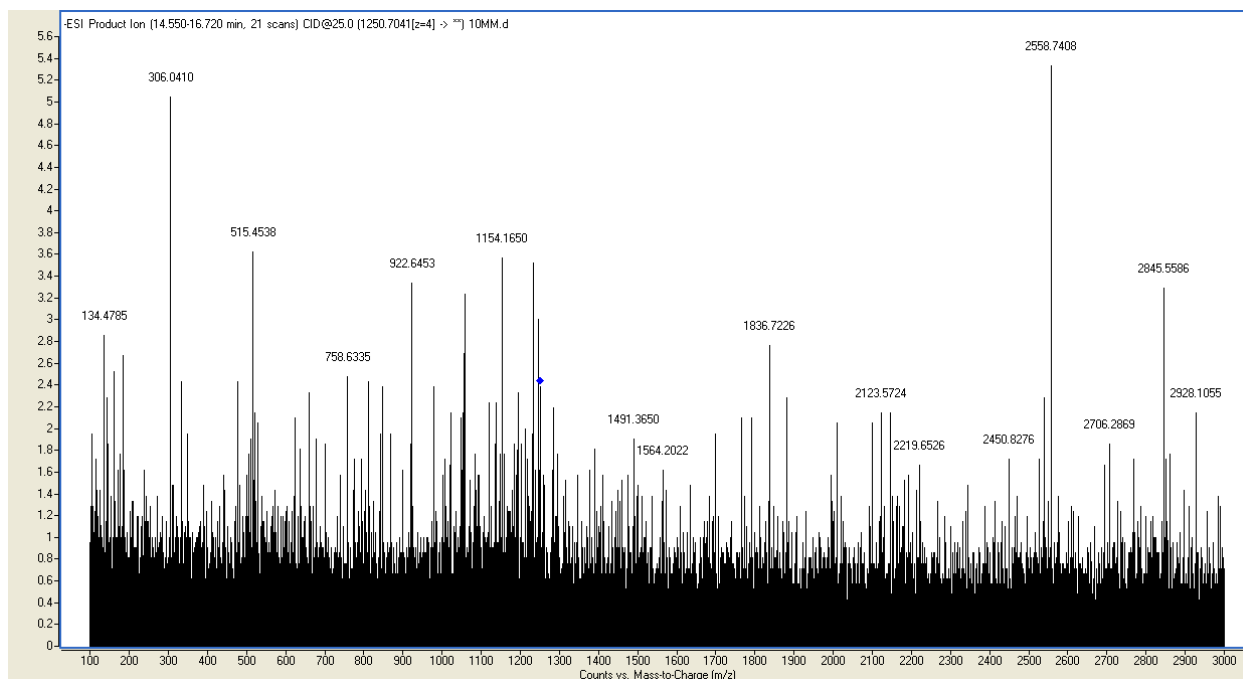

Figure S26. MS/MS fragmentation spectrum of 16mer containing HO-HF (repair intermediate) in the reaction of HF with AlkB. The blue diamond marks the parent ion.

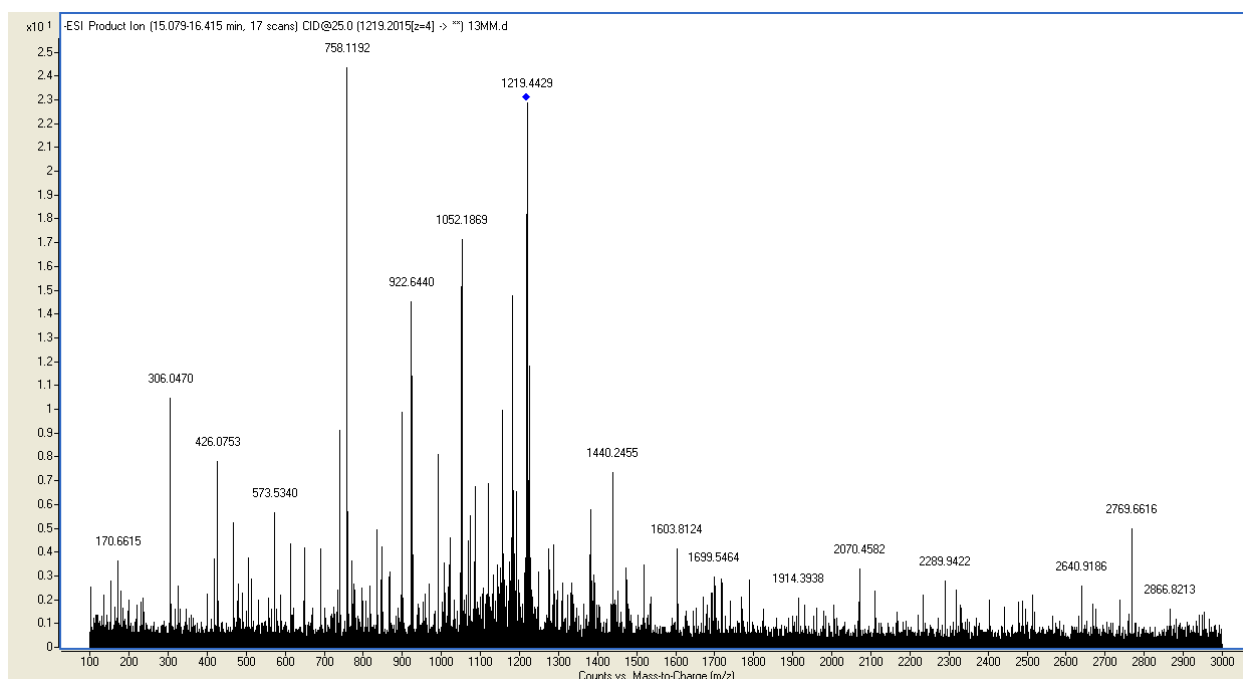

Figure S27. MS/MS fragmentation spectrum of 16mer containing m4C (unreacted starting material) in the reaction of m4C with AlkB. The blue diamond marks the parent ion.



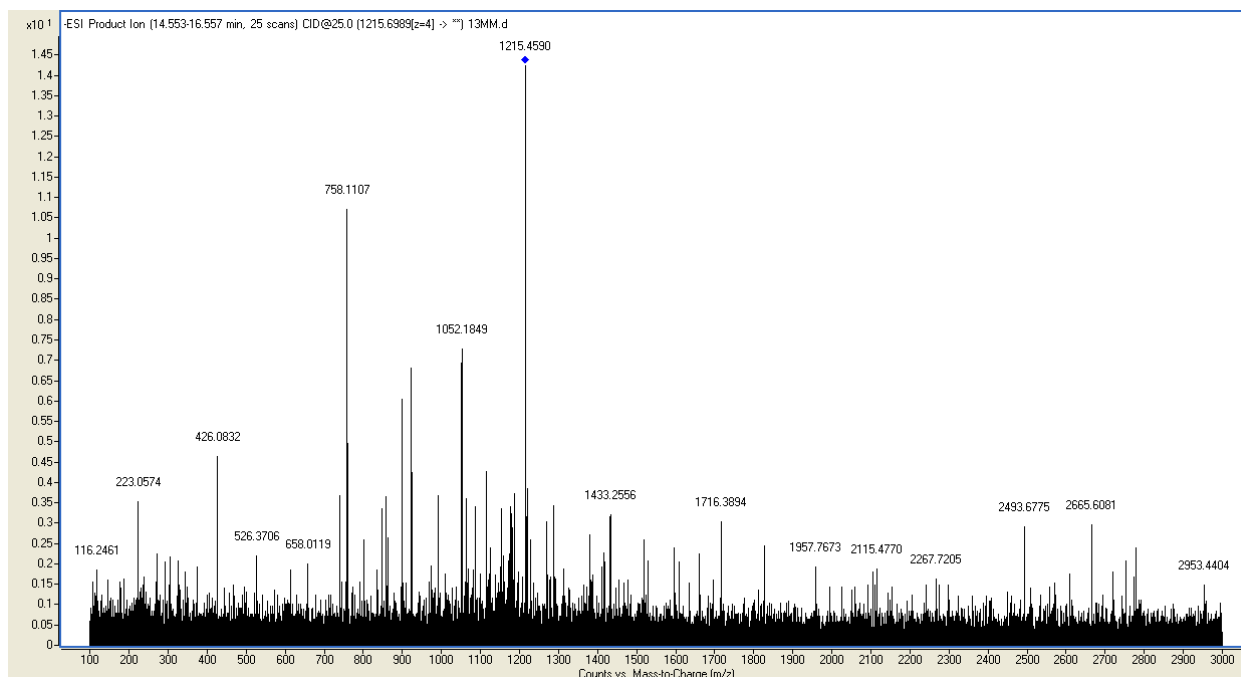

Figure S28. MS/MS fragmentation spectrum of 16mer containing C (repair product) in the reaction of m4C with AlkB. The blue diamond marks the parent ion.

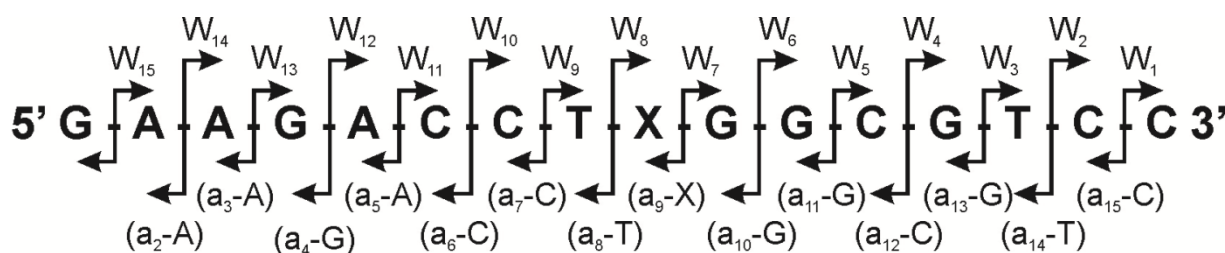

Figure S29. Predicted collision-induced dissociation (CID) fragmentation pattern of the 16mer oligonucleotide. X denotes the lesion or repair reaction intermediate or product. The  $m/z$  theoretical values of the CID fragments, calculated using Mongo Oligo Mass Calculator v2.06 (<http://library.med.utah.edu/masspec/mongo.htm>) are shown in Table S2-S12.

Table S1. Percentage of lesion repair by AlkB in 1h in ssDNA and dsDNA.

| Lesion | Complementary Base | Repair in ssDNA (%) | Repair in dsDNA (%) |
|--------|--------------------|---------------------|---------------------|
| m2G    | C                  | 7.8                 | 1.2                 |
| e2G    | C                  | 31.9                | 1.0                 |
| FF     | C                  | 8.7                 | 0.0                 |
| HF     | C                  | 2.6                 | 0.4                 |
| m4C    | G                  | 37.7                | 0.0                 |
| m1A    | T                  | 21.0                | 23.7                |

Table S2. Predicted and observed  $m/z$  for MS/MS fragmentation patterns displayed in Figure S18 of m2G 16mer in the reaction of m2G with AlkB. Predicted CID fragments are shown in Figure S29.

| <b>Fragment</b> | <b>Charge</b> | <b>Theoretical <math>m/z</math></b> | <b>Observed <math>m/z</math></b> |
|-----------------|---------------|-------------------------------------|----------------------------------|
| W1              | -1            | 306.048                             | 306.051                          |
| W2              | -1            | 595.094                             | 595.076                          |
| W3              | -1            | 899.139                             | 899.129                          |
| W4              | -2            | 613.592                             | 613.568                          |
| W5              | -2            | 758.115                             | 758.108                          |
| W6              | -2            | 922.641                             | 922.627                          |
| W7              | -2            | 1087.167                            | 1087.162                         |
| W8              | -2            | 1258.701                            | 1258.709                         |
| W9              | -2            | 1410.723                            | 1410.787                         |
| W10             | -3            | 1036.495                            | 1036.471                         |
| W11             | -3            | 1132.844                            | 1132.862                         |
| W12             | -3            | 1237.196                            | 1237.200                         |
| W14             | -4            | 1088.172                            | 1088.138                         |
| W15             | -4            | 1166.437                            | 1166.432                         |
| a2-A            | -1            | 426.080                             | 426.075                          |
| a3-A            | -1            | 739.137                             | 739.153                          |
| a4-G            | -1            | 1052.195                            | 1052.187                         |
| a5-A            | -1            | 1381.247                            | 1381.233                         |
| a6-C            | -2            | 846.648                             | 846.635                          |
| a7-C            | -2            | 991.171                             | 991.162                          |
| a8-T            | -2            | 1135.694                            | 1135.666                         |
| a9-X            | -2            | 1287.717                            | 1287.732                         |
| a10-G           | -2            | 1459.251                            | 1459.183                         |
| a11-G           | -2            | 1623.777                            | 1623.742                         |
| a13-G           | -3            | 1288.214                            | 1288.202                         |

Table S3. Predicted and observed  $m/z$  for MS/MS fragmentation patterns displayed in Figure S19 of G 16mer in the reaction of m2G with AlkB. Predicted CID fragments are shown in Figure S29.

| <b>Fragment</b> | <b>Charge</b> | <b>Theoretical <math>m/z</math></b> | <b>Observed <math>m/z</math></b> |
|-----------------|---------------|-------------------------------------|----------------------------------|
| W3              | -1            | 899.139                             | 899.133                          |
| W5              | -2            | 758.115                             | 758.113                          |
| W6              | -2            | 922.641                             | 922.629                          |
| W7              | -2            | 1087.167                            | 1087.192                         |
| W10             | -3            | 1031.823                            | 1031.860                         |
| W11             | -3            | 1128.172                            | 1128.191                         |
| W12             | -4            | 924.141                             | 924.117                          |
| W13             | -4            | 1006.404                            | 1006.304                         |
| W14             | -4            | 1084.668                            | 1084.625                         |
| a2-A            | -1            | 426.080                             | 426.077                          |
| a3-A            | -1            | 739.137                             | 739.151                          |
| a5-A            | -2            | 690.119                             | 690.119                          |
| a6-C            | -2            | 846.648                             | 846.617                          |
| a7-C            | -2            | 991.171                             | 991.128                          |
| a8-T            | -3            | 756.793                             | 756.558                          |
| a9-X            | -3            | 858.142                             | 858.138                          |
| a10-G           | -3            | 967.826                             | 967.826                          |
| a12-C           | -3            | 1187.194                            | 1187.151                         |
| a13-G           | -3            | 1283.543                            | 1283.523                         |
| a14-T           | -3            | 1393.227                            | 1393.330                         |
| a15-C           | -3            | 1494.575                            | 1494.545                         |

Table S4. Predicted and observed  $m/z$  for MS/MS fragmentation patterns displayed in Figure S20 of e2G 16mer in the reaction of e2G with AlkB. Predicted CID fragments are shown in Figure S29.

| <b>Fragment</b> | <b>Charge</b> | <b>Theoretical <math>m/z</math></b> | <b>Observed <math>m/z</math></b> |
|-----------------|---------------|-------------------------------------|----------------------------------|
| W1              | -1            | 306.048                             | 306.048                          |
| W3              | -1            | 899.139                             | 899.138                          |
| W4              | -2            | 613.592                             | 613.432                          |
| W5              | -2            | 758.115                             | 758.119                          |
| W6              | -2            | 922.641                             | 922.641                          |
| W7              | -2            | 1087.167                            | 1087.192                         |
| W8              | -2            | 1265.709                            | 1265.452                         |
| W9              | -2            | 1417.731                            | 1417.741                         |
| W10             | -3            | 1041.167                            | 1041.196                         |
| W11             | -3            | 1137.516                            | 1137.522                         |
| W12             | -3            | 1241.868                            | 1241.845                         |
| W13             | -3            | 1351.552                            | 1351.574                         |
| W14             | -4            | 1091.676                            | 1091.489                         |
| W15             | -4            | 1169.941                            | 1169.943                         |
| a2-A            | -1            | 426.080                             | 426.080                          |
| a3-A            | -1            | 739.137                             | 739.148                          |
| a4-G            | -1            | 1052.195                            | 1052.206                         |
| a5-A            | -1            | 1381.247                            | 1381.254                         |
| a6-C            | -2            | 846.648                             | 846.652                          |
| a7-C            | -2            | 991.171                             | 991.167                          |
| a9-X            | -2            | 1287.717                            | 1287.711                         |
| a10-G           | -2            | 1466.259                            | 1466.266                         |
| a11-G           | -2            | 1630.785                            | 1630.793                         |
| a12-C           | -3            | 1196.538                            | 1196.552                         |
| a13-G           | -3            | 1292.886                            | 1292.731                         |
| a14-T           | -3            | 1402.570                            | 1402.406                         |

Table S5. Predicted and observed  $m/z$  for MS/MS fragmentation patterns displayed in Figure S21 of G 16mer in the reaction of e2G with AlkB. Predicted CID fragments are shown in Figure S29.

| <b>Fragment</b> | <b>Charge</b> | <b>Theoretical <math>m/z</math></b> | <b>Observed <math>m/z</math></b> |
|-----------------|---------------|-------------------------------------|----------------------------------|
| W1              | -1            | 306.048                             | 306.046                          |
| W3              | -1            | 899.139                             | 899.157                          |
| W4              | -2            | 613.592                             | 613.602                          |
| W5              | -2            | 758.115                             | 758.111                          |
| W6              | -2            | 922.641                             | 922.676                          |
| W7              | -2            | 1087.167                            | 1087.169                         |
| W8              | -2            | 1251.693                            | 1251.833                         |
| W9              | -2            | 1403.716                            | 1403.734                         |
| W10             | -3            | 1031.823                            | 1031.844                         |
| W11             | -3            | 1128.172                            | 1128.180                         |
| W12             | -4            | 924.141                             | 924.145                          |
| W13             | -4            | 1006.404                            | 1006.383                         |
| W14             | -3            | 1446.561                            | 1446.456                         |
| W15             | -4            | 1162.933                            | 1162.879                         |
| a2-A            | -1            | 426.080                             | 426.078                          |
| a3-A            | -1            | 739.137                             | 739.145                          |
| a4-G            | -1            | 1052.195                            | 1052.217                         |
| a5-A            | -1            | 1381.247                            | 1381.242                         |
| a6-C            | -2            | 846.648                             | 846.640                          |
| a7-C            | -2            | 991.171                             | 991.169                          |
| a8-T            | -2            | 1135.694                            | 1135.683                         |
| a9-X            | -3            | 858.142                             | 858.096                          |
| a11-G           | -3            | 1077.510                            | 1077.563                         |
| a13-G           | -3            | 1283.543                            | 1283.536                         |
| a15-C           | -4            | 1120.679                            | 1120.686                         |

Table S6. Predicted and observed  $m/z$  for MS/MS fragmentation patterns displayed in Figure S22 of FF 16mer in the reaction of FF with AlkB. Predicted CID fragments are shown in Figure S29.

| <b>Fragment</b> | <b>Charge</b> | <b>Theoretical <math>m/z</math></b> | <b>Observed <math>m/z</math></b> |
|-----------------|---------------|-------------------------------------|----------------------------------|
| W1              | -1            | 306.048                             | 306.042                          |
| W3              | -1            | 899.139                             | 899.149                          |
| W4              | -1            | 1228.192                            | 1228.224                         |
| W5              | -2            | 758.115                             | 758.120                          |
| W6              | -2            | 922.641                             | 922.640                          |
| W7              | -2            | 1087.167                            | 1087.174                         |
| W9              | -2            | 1443.729                            | 1443.695                         |
| W10             | -3            | 1058.499                            | 1058.502                         |
| W11             | -3            | 1154.847                            | 1154.837                         |
| W12             | -3            | 1259.200                            | 1259.184                         |
| W13             | -3            | 1368.884                            | 1368.665                         |
| W14             | -4            | 1104.675                            | 1104.539                         |
| W15             | -4            | 1182.939                            | 1182.921                         |
| a2-A            | -1            | 426.080                             | 426.073                          |
| a3-A            | -1            | 739.137                             | 739.147                          |
| a4-G            | -1            | 1052.195                            | 1052.185                         |
| a6-C            | -2            | 846.648                             | 846.650                          |
| a7-C            | -2            | 991.171                             | 991.185                          |
| a8-T            | -3            | 756.793                             | 756.602                          |
| a9-X            | -2            | 1287.717                            | 1287.730                         |
| a10-G           | -3            | 994.501                             | 994.457                          |
| a11-G           | -3            | 1104.185                            | 1104.215                         |
| a12-C           | -3            | 1213.869                            | 1213.705                         |
| a13-G           | -3            | 1310.218                            | 1310.551                         |

Table S7. Predicted and observed  $m/z$  for MS/MS fragmentation patterns displayed in Figure S23 of G 16mer in the reaction of FF with AlkB. Predicted CID fragments are shown in Figure S29.

| <b>Fragment</b> | <b>Charge</b> | <b>Theoretical <math>m/z</math></b> | <b>Observed <math>m/z</math></b> |
|-----------------|---------------|-------------------------------------|----------------------------------|
| W1              | -1            | 306.048                             | 306.036                          |
| W3              | -1            | 899.139                             | 899.140                          |
| W4              | -2            | 613.592                             | 613.576                          |
| W5              | -2            | 758.115                             | 758.108                          |
| W6              | -2            | 922.641                             | 922.634                          |
| W7              | -2            | 1087.167                            | 1087.179                         |
| W8              | -2            | 1251.693                            | 1251.725                         |
| W9              | -2            | 1403.716                            | 1403.651                         |
| W10             | -3            | 1031.823                            | 1031.743                         |
| W11             | -3            | 1128.172                            | 1128.167                         |
| W13             | -4            | 1006.404                            | 1006.654                         |
| W14             | -3            | 1446.561                            | 1446.583                         |
| W15             | -4            | 1162.933                            | 1163.003                         |
| a2-A            | -1            | 426.080                             | 426.091                          |
| a3-A            | -1            | 739.137                             | 739.133                          |
| a4-G            | -1            | 1052.195                            | 1052.184                         |
| a5-A            | -1            | 1381.247                            | 1381.219                         |
| a6-C            | -2            | 846.648                             | 846.633                          |
| a7-C            | -2            | 991.171                             | 991.122                          |
| a8-T            | -2            | 1135.694                            | 1135.873                         |
| a9-X            | -2            | 1287.717                            | 1287.724                         |
| a10-G           | -2            | 1452.243                            | 1452.240                         |
| a11-G           | -3            | 1077.510                            | 1077.490                         |
| a12-C           | -3            | 1187.194                            | 1187.189                         |
| a13-G           | -3            | 1283.543                            | 1283.613                         |

Table S8. Predicted and observed  $m/z$  for MS/MS fragmentation patterns displayed in Figure S24 of HF 16mer in the reaction of HF with AlkB. Predicted CID fragments are shown in Figure S29.

| <b>Fragment</b> | <b>Charge</b> | <b>Theoretical <math>m/z</math></b> | <b>Observed <math>m/z</math></b> |
|-----------------|---------------|-------------------------------------|----------------------------------|
| W1              | -1            | 306.048                             | 306.048                          |
| W3              | -1            | 899.139                             | 899.144                          |
| W4              | -2            | 613.592                             | 613.603                          |
| W5              | -2            | 758.115                             | 758.125                          |
| W6              | -2            | 922.641                             | 922.642                          |
| W7              | -2            | 1087.167                            | 1087.180                         |
| W8              | -2            | 1293.722                            | 1293.749                         |
| W9              | -2            | 1445.744                            | 1445.790                         |
| W10             | -3            | 1059.842                            | 1059.806                         |
| W11             | -3            | 1156.191                            | 1156.169                         |
| W12             | -3            | 1260.543                            | 1260.555                         |
| W13             | -4            | 1027.418                            | 1027.463                         |
| W14             | -4            | 1105.683                            | 1105.677                         |
| W15             | -4            | 1183.947                            | 1183.921                         |
| a2-A            | -1            | 426.080                             | 426.096                          |
| a3-A            | -1            | 739.137                             | 739.131                          |
| a4-G            | -1            | 1052.195                            | 1052.213                         |
| a5-A            | -1            | 1381.247                            | 1381.230                         |
| a6-C            | -2            | 846.648                             | 846.658                          |
| a7-C            | -2            | 991.171                             | 991.168                          |
| a9-X            | -2            | 1287.717                            | 1287.744                         |
| a10-G           | -2            | 1494.272                            | 1494.255                         |
| a11-G           | -2            | 1658.798                            | 1658.673                         |
| a12-C           | -3            | 1215.213                            | 1215.224                         |
| a13-G           | -3            | 1311.562                            | 1311.538                         |



Table S9. Predicted and observed  $m/z$  for MS/MS fragmentation patterns displayed in Figure S25 of G 16mer in the reaction of HF with AlkB. Predicted CID fragments are shown in Figure S29.

| <b>Fragment</b> | <b>Charge</b> | <b>Theoretical <math>m/z</math></b> | <b>Observed <math>m/z</math></b> |
|-----------------|---------------|-------------------------------------|----------------------------------|
| W5              | -2            | 758.115                             | 758.124                          |
| W6              | -2            | 922.641                             | 922.671                          |
| W8              | -2            | 1251.693                            | 1251.777                         |
| W9              | -2            | 1403.716                            | 1403.682                         |
| W10             | -3            | 1031.823                            | 1031.694                         |
| W11             | -3            | 1128.172                            | 1128.065                         |
| W13             | -4            | 1006.404                            | 1006.441                         |
| W15             | -4            | 1162.933                            | 1162.906                         |
| a2-A            | -1            | 426.080                             | 426.095                          |
| a4-G            | -1            | 1052.195                            | 1052.191                         |
| a5-A            | -1            | 1381.247                            | 1381.210                         |
| a7-C            | -2            | 991.171                             | 991.166                          |
| a9-X            | -3            | 858.142                             | 858.118                          |
| a11-G           | -3            | 1077.510                            | 1077.551                         |
| a12-C           | -3            | 1187.194                            | 1187.252                         |
| a13-G           | -3            | 1283.543                            | 1283.532                         |

Table S10. Predicted and observed  $m/z$  for MS/MS fragmentation patterns displayed in Figure S26 of HO-HF 16mer in the reaction of HF with AlkB. Predicted CID fragments are shown in Figure S29.

| <b>Fragment</b> | <b>Charge</b> | <b>Theoretical <math>m/z</math></b> | <b>Observed <math>m/z</math></b> |
|-----------------|---------------|-------------------------------------|----------------------------------|
| W1              | -1            | 306.048                             | 306.041                          |
| W2              | -1            | 595.094                             | 595.150                          |
| W3              | -1            | 899.139                             | 899.129                          |
| W5              | -2            | 758.115                             | 758.105                          |
| W6              | -2            | 922.641                             | 922.645                          |
| W7              | -2            | 1087.167                            | 1087.146                         |
| W8              | -3            | 867.477                             | 867.452                          |
| W9              | -3            | 968.825                             | 968.846                          |
| W10             | -3            | 1065.174                            | 1065.226                         |
| W13             | -4            | 1031.417                            | 1031.465                         |
| W14             | -4            | 1109.682                            | 1109.703                         |
| a2-A            | -1            | 426.080                             | 426.079                          |
| a3-A            | -1            | 739.137                             | 739.120                          |
| a4-G            | -1            | 1052.195                            | 1052.189                         |
| a5-A            | -1            | 1381.247                            | 1381.172                         |
| a6-C            | -2            | 846.648                             | 846.609                          |
| a10-G           | -3            | 1001.177                            | 1001.194                         |
| a11-G           | -3            | 1110.861                            | 1110.877                         |
| a12-C           | -3            | 1220.545                            | 11220.484                        |
| a13-G           | -3            | 1316.893                            | 1316.910                         |
| a14-T           | -4            | 1069.681                            | 1069.618                         |
| a15-C           | -4            | 1145.692                            | 1145.667                         |

Table S11. Predicted and observed  $m/z$  for MS/MS fragmentation patterns displayed in Figure S27 of m4C 16mer in the reaction of m4C with AlkB. Predicted CID fragments are shown in Figure S29.

| <b>Fragment</b> | <b>Charge</b> | <b>Theoretical <math>m/z</math></b> | <b>Observed <math>m/z</math></b> |
|-----------------|---------------|-------------------------------------|----------------------------------|
| W1              | -1            | 306.048                             | 306.047                          |
| W3              | -1            | 899.139                             | 899.143                          |
| W4              | -2            | 613.592                             | 613.603                          |
| W5              | -2            | 758.115                             | 758.119                          |
| W6              | -2            | 922.641                             | 922.644                          |
| W7              | -2            | 1087.167                            | 1087.183                         |
| W9              | -2            | 1390.720                            | 1390.729                         |
| W10             | -2            | 1535.243                            | 1535.257                         |
| W11             | -3            | 1119.508                            | 1119.482                         |
| W12             | -3            | 1223.861                            | 1223.833                         |
| W13             | -3            | 1333.545                            | 1333.490                         |
| W14             | -3            | 1437.897                            | 1437.903                         |
| W15             | -4            | 1156.435                            | 1156.678                         |
| a2-A            | -1            | 426.080                             | 426.075                          |
| a3-A            | -1            | 739.137                             | 739.143                          |
| a4-G            | -1            | 1052.195                            | 1052.187                         |
| a5-A            | -1            | 1381.247                            | 1381.259                         |
| a6-C            | -2            | 846.648                             | 846.677                          |
| a7-C            | -2            | 991.171                             | 991.169                          |
| a9-X            | -2            | 1287.717                            | 1287.750                         |
| a10-G           | -2            | 1439.248                            | 1439.216                         |
| a11-G           | -2            | 1603.774                            | 1603.812                         |
| a12-C           | -2            | 1768.300                            | 1768.318                         |
| a13-G           | -3            | 1274.879                            | 1274.823                         |
| a15-C           | -4            | 1114.182                            | 1114.087                         |

Table S12. Predicted and observed  $m/z$  for MS/MS fragmentation patterns displayed in Figure S28 of C 16mer in the reaction of m4C with AlkB. Predicted CID fragments are shown in Figure S29.

| <b>Fragment</b> | <b>Charge</b> | <b>Theoretical <math>m/z</math></b> | <b>Observed <math>m/z</math></b> |
|-----------------|---------------|-------------------------------------|----------------------------------|
| W1              | -1            | 306.048                             | 306.043                          |
| W3              | -1            | 899.139                             | 899.127                          |
| W4              | -2            | 613.592                             | 613.597                          |
| W5              | -2            | 758.115                             | 758.111                          |
| W6              | -2            | 922.641                             | 922.652                          |
| W7              | -2            | 1087.167                            | 1087.162                         |
| W8              | -2            | 1231.690                            | 1231.629                         |
| W9              | -2            | 1383.712                            | 1383.684                         |
| W10             | -3            | 1018.488                            | 1018.455                         |
| W11             | -3            | 1114.836                            | 1114.847                         |
| W12             | -3            | 1219.189                            | 1219.179                         |
| W13             | -3            | 1328.873                            | 1328.715                         |
| W14             | -4            | 1074.667                            | 1074.614                         |
| W15             | -4            | 1152.931                            | 1152.882                         |
| a2-A            | -1            | 426.080                             | 426.083                          |
| a3-A            | -1            | 739.137                             | 739.124                          |
| a4-G            | -1            | 1052.195                            | 1052.185                         |
| a5-A            | -1            | 1381.247                            | 1381.255                         |
| a6-C            | -2            | 846.648                             | 846.656                          |
| a7-C            | -2            | 991.171                             | 991.188                          |
| a9-X            | -3            | 858.142                             | 858.126                          |
| a10-G           | -3            | 954.490                             | 954.555                          |
| a11-G           | -3            | 1064.174                            | 1064.229                         |
| a13-G           | -3            | 1270.207                            | 1270.372                         |
| a14-T           | -3            | 1379.891                            | 1379.838                         |
| a15-C           | -4            | 1110.678                            | 1110.655                         |
